# Supplementary material for: Early socialization and environmental enrichment of lactating piglets affects the caecal microbiota and metabolomic response after weaning
Source: PubMed Central journal article supplement (PMC7969613; doi:10.1038/s41598-021-85460-7), 2021-03-17
Supplement: 41598_2021_85460_MOESM1_ESM.pdf [file 41598_2021_85460_MOESM1_ESM.pdf]

# **Early socialization and environmental enrichment of lactating piglets affects the caecal microbiota and metabolomic response after weaning**

Saladrigas-García, M.<sup>1</sup>, D'Angelo, M. <sup>1</sup>, Ko, H.L. <sup>1</sup>, Traserra, S. <sup>2</sup>, Nolis, P. <sup>3</sup>, Ramayo-Caldas, Y.<sup>4</sup>, Folch, J.M. <sup>5,6</sup>, Vergara, P. <sup>2</sup>, Llonch, P. <sup>1</sup>, Pérez J.F. <sup>1</sup>, Martín-Orúe, S.M. <sup>1</sup> \*

<sup>1</sup> Animal Nutrition and Welfare Service, Department of Animal and Food Science, Universitat Autònoma de Barcelona (UAB), 08193 Bellaterra, Spain

<sup>2</sup> Department of Cell Biology, Physiology and Immunology, Universitat Autònoma de Barcelona (UAB), 08193 Bellaterra, Spain

<sup>3</sup> Nuclear Magnetic Resonance (SeRMN), Universitat Autònoma de Barcelona (UAB), 08193 Bellaterra, Spain

<sup>4</sup> Animal Breeding and Genetics Program, Institute for Research and Technology in Food and Agriculture (IRTA), Torre Marimon, 08140 Caldes de Montbui, Spain.

<sup>5</sup> Plant and Animal Genomics, Centre for Research in Agricultural Genomics (CRAG), CSIC-IRTA-UAB-UB Consortium, 08193 Bellaterra, Spain.

<sup>6</sup> Department of Animal and Food Science, Universitat Autònoma de Barcelona (UAB), 08193 Bellaterra, Spain.

\* Corresponding author (susana.martin@uab.cat)

## Supplementary information

### Supplementary tables

Supplementary Table S1. Phylum relative counts for suckling and weaned piglets (from highest to lowest considering the global average) and for conventional reared piglets (CTR) or with environmental enrichment (ENR). All the detected phyla are included.

|                        | LACT  |       |       |            | WEAN  |       |       |            |
|------------------------|-------|-------|-------|------------|-------|-------|-------|------------|
|                        | CTR   | ENR   | SEM   | adjPvalues | CTR   | ENR   | SEM   | adjPvalues |
| <i>Firmicutes</i>      | 38.18 | 39.45 | 3.264 | 0.9626     | 57.37 | 43.31 | 4.182 | 0.6236     |
| <i>Bacteroidetes</i>   | 43.69 | 42.74 | 3.080 | 0.9626     | 30.04 | 36.35 | 2.998 | 0.5997     |
| <i>Proteobacteria</i>  | 6.32  | 6.52  | 0.889 | 0.9626     | 5.18  | 13.00 | 2.162 | 0.4410     |
| <i>Spirochaetes</i>    | 1.96  | 4.85  | 1.064 | 0.9626     | 3.83  | 3.31  | 0.589 | 0.9941     |
| <i>Fusobacteria</i>    | 6.80  | 2.63  | 1.953 | 0.7823     | 0.03  | 1.96  | 0.644 | 0.3571     |
| <i>Planctomycetes</i>  | 0.34  | 0.77  | 0.201 | 0.9177     | 0.48  | 0.19  | 0.120 | 0.9228     |
| <i>Cyanobacteria</i>   | 0.33  | 0.97  | 0.297 | 0.7823     | 0.32  | 0.09  | 0.082 | 0.5997     |
| <i>Synergistetes</i>   | 0.47  | 0.78  | 0.193 | 0.9369     | 0.13  | 0.26  | 0.051 | 0.6236     |
| <i>Verrucomicrobia</i> | 0.68  | 0.29  | 0.235 | 0.9634     | 0.31  | 0.33  | 0.083 | 0.9990     |
| <i>Actinobacteria</i>  | 0.26  | 0.11  | 0.094 | 0.9626     | 0.54  | 0.25  | 0.113 | 0.5997     |
| <i>Tenericutes</i>     | 0.18  | 0.10  | 0.036 | 0.9177     | 0.67  | 0.17  | 0.180 | 0.4410     |
| <i>Elusimicrobia</i>   | 0.44  | 0.14  | 0.129 | 0.9177     | 0.14  | 0.27  | 0.103 | 0.5997     |
| <i>Lentisphaerae</i>   | 0.16  | 0.31  | 0.084 | 0.9626     | 0.01  | 0.07  | 0.020 | 0.4410     |
| <i>Chlamydiae</i>      | 0.00  | 0.01  | 0.005 | 0.6237     | 0.45  | 0.01  | 0.127 | 0.1537     |
| <i>Deferribacteres</i> | 0.04  | 0.09  | 0.024 | 0.6237     | 0.07  | 0.23  | 0.066 | 0.5413     |
| <i>Fibrobacteres</i>   | 0.02  | 0.09  | 0.038 | 0.9177     | 0.19  | 0.13  | 0.051 | 0.9990     |
| <i>TM7</i>             | 0.01  | 0.11  | 0.041 | 0.4849     | 0.15  | 0.02  | 0.036 | 0.4390     |
| <i>Euryarchaeota</i>   | 0.05  | 0.03  | 0.008 | 0.9626     | 0.07  | 0.04  | 0.015 | 0.5997     |
| <i>WPS-2</i>           | 0.07  | 0.01  | 0.032 | 0.9177     | 0.01  | 0.01  | 0.003 | 0.5413     |

**Supplementary Table S2.** Genus relative abundance counts for suckling and weaned piglets (from highest to lowest considering the global average) and in conventional reared piglets (CTR) or with environmental enrichment (ENR). Only predominant genera (+1%) are included.

|                              | LACT  |       |       |            | WEAN  |       |       |            |
|------------------------------|-------|-------|-------|------------|-------|-------|-------|------------|
|                              | CTR   | ENR   | SEM   | adjPvalues | CTR   | ENR   | SEM   | adjPvalues |
| <i>Prevotella</i>            | 18.78 | 13.66 | 2.243 | 0.9573     | 11.93 | 10.06 | 2.015 | 0.9432     |
| [ <i>Prevotella</i> ]        | 6.72  | 6.21  | 1.080 | 0.9573     | 5.28  | 12.57 | 1.650 | 0.4413     |
| <i>Bacteroides</i>           | 5.90  | 8.12  | 1.507 | 0.9573     | 2.50  | 2.66  | 0.542 | 0.8931     |
| <i>Phascolarctobacterium</i> | 3.33  | 3.30  | 0.591 | 0.9842     | 4.77  | 3.23  | 0.430 | 0.4413     |
| <i>Campylobacter</i>         | 1.26  | 1.10  | 0.422 | 0.9573     | 1.45  | 8.29  | 2.092 | 0.3842     |
| <i>Fusobacterium</i>         | 6.81  | 2.63  | 1.954 | 0.7993     | 0.03  | 1.96  | 0.645 | 0.3842     |
| <i>Oscillospira</i>          | 2.65  | 2.30  | 0.333 | 0.9842     | 2.57  | 2.80  | 0.302 | 0.9432     |
| <i>Treponema</i>             | 0.81  | 2.98  | 0.863 | 0.9573     | 3.16  | 1.46  | 0.517 | 0.6459     |
| <i>p-75-a5</i>               | 0.72  | 0.47  | 0.250 | 0.9573     | 3.38  | 2.47  | 0.868 | 0.9432     |
| <i>Lactobacillus</i>         | 2.72  | 2.07  | 0.718 | 0.9573     | 0.43  | 0.82  | 0.325 | 0.5380     |
| <i>Megasphaera</i>           | 2.67  | 1.86  | 0.685 | 0.9573     | 0.40  | 0.83  | 0.316 | 0.8931     |
| <i>Sphaerochaeta</i>         | 1.15  | 1.88  | 0.466 | 0.9573     | 0.67  | 1.86  | 0.411 | 0.5266     |
| <i>Roseburia</i>             | 0.21  | 0.17  | 0.076 | 0.9573     | 3.05  | 1.18  | 0.703 | 0.5380     |
| <i>Anaerovibrio</i>          | 0.94  | 0.38  | 0.448 | 0.9573     | 1.80  | 0.94  | 0.286 | 0.5266     |
| <i>CF231</i>                 | 1.23  | 1.09  | 0.249 | 0.9573     | 0.60  | 0.69  | 0.164 | 0.8931     |
| <i>Desulfovibrio</i>         | 0.73  | 0.68  | 0.108 | 0.9573     | 1.15  | 0.77  | 0.259 | 0.9432     |
| <i>Butyricimonas</i>         | 0.59  | 1.14  | 0.308 | 0.9573     | 0.12  | 0.61  | 0.153 | 0.4746     |
| <i>Ruminococcus</i>          | 0.33  | 0.30  | 0.085 | 0.9573     | 1.18  | 0.65  | 0.193 | 0.5226     |

**Supplementary Table S3.** PCA and OPLS-DA models parameters for <sup>1</sup>H-NMR serum profiles of weaned piglets

| Enriched vs control P-value | n | PCA                  |                                  |                                 | OPLS-DA              |                                  |                                  |                                 |
|-----------------------------|---|----------------------|----------------------------------|---------------------------------|----------------------|----------------------------------|----------------------------------|---------------------------------|
|                             |   | Number of components | R <sup>2</sup> <sub>x(cum)</sub> | Q <sup>2</sup> <sub>(cum)</sub> | Number of components | R <sup>2</sup> <sub>x(cum)</sub> | R <sup>2</sup> <sub>y(cum)</sub> | Q <sup>2</sup> <sub>(cum)</sub> |
| Total spectre               | 7 | 1+1                  | 0.64                             | 0.31                            | 1+1                  | 0.62                             | 0.57                             | 0.28                            |
| ≤ 0.20                      | 7 | 2                    | 0.85                             | 0.76                            | 1+1                  | 0.83                             | 0.57                             | 0.33                            |

|        |   |   |      |      |     |      |      |      |
|--------|---|---|------|------|-----|------|------|------|
| ≤ 0.18 | 7 | 2 | 0.88 | 0.81 | 1+1 | 0.87 | 0.52 | 0.28 |
| ≤0.16  | 7 | 2 | 0.89 | 0.83 | 1+1 | 0.88 | 0.52 | 0.29 |
| ≤0.14  | 7 | 2 | 0.88 | 0.81 | 1+1 | 0.86 | 0.61 | 0.32 |
| ≤0.12  | 7 | 2 | 0.90 | 0.81 | 1+1 | 0.86 | 0.66 | 0.34 |
| ≤0.10  | 7 | 2 | 0.90 | 0.81 | 1+1 | 0.86 | 0.66 | 0.34 |
| ≤0.08  | 7 | 2 | 0.90 | 0.81 | 2   | 0.89 | 0.68 | 0.47 |
| ≤0.06  | 7 | 3 | 0.95 | 0.83 | 2   | 0.91 | 0.68 | 0.53 |

Supplementary Table S4. Brief description of the genes analysed.

| Gene abbreviation              | Gene full name                             | Functional group                     |
|--------------------------------|--------------------------------------------|--------------------------------------|
| <b>OCLN</b>                    | Occludin                                   | Intestinal barrier                   |
| <b>ZO1</b>                     | Zonula occludens 1                         | Intestinal barrier                   |
| <b>CLDN1</b>                   | Claudin-1                                  | Intestinal barrier                   |
| <b>CLDN4</b>                   | Claudin-4                                  | Intestinal barrier                   |
| <b>CLDN15</b>                  | Claudin-15                                 | Intestinal barrier                   |
| <b>MUC2</b>                    | Mucin 2                                    | Intestinal barrier                   |
| <b>MUC13</b>                   | Mucin 13                                   | Intestinal barrier                   |
| <b>TFF3</b>                    | Trefoil factor 3                           | Intestinal barrier                   |
| <b>TLR2</b>                    | Toll-like receptor 2                       | Pattern recognition receptors (PRRs) |
| <b>TLR4</b>                    | Toll-like receptor 4                       | Pattern recognition receptors (PRRs) |
| <b>IL1<math>\beta</math></b>   | Interleukin 1 beta                         | Immune response                      |
| <b>IL6</b>                     | Interleukin 6                              | Immune response                      |
| <b>IL8</b>                     | Interleukin 8                              | Immune response                      |
| <b>IL10</b>                    | Interleukin 10                             | Immune response                      |
| <b>IL17A</b>                   | Interleukin 17                             | Immune response                      |
| <b>IL22</b>                    | Interleukin 22                             | Immune response                      |
| <b>IFN-<math>\gamma</math></b> | Interferon gamma                           | Immune response                      |
| <b>TNF-<math>\alpha</math></b> | Tumor necrosis factor alpha                | Immune response                      |
| <b>TGF-<math>\beta</math>1</b> | Transforming growth factor beta 1          | Immune response                      |
| <b>CCL20</b>                   | Chemokine (C-C motif) ligand 20            | Immune response                      |
| <b>CXCL2</b>                   | Chemokine (C-X-C motif) ligand 2           | Immune response                      |
| <b>IFNGR1</b>                  | Interferon gamma receptor 1                | Immune response                      |
| <b>REG3G</b>                   | Regenerating-islet derived protein 3 gamma | Immune response                      |

|                                   |                                                                                   |                            |
|-----------------------------------|-----------------------------------------------------------------------------------|----------------------------|
| <b>PPARGC1<math>\alpha</math></b> | Peroxisome proliferative activated receptor gamma, coactivator 1 alpha            | Immune response            |
| <b>FAXDC2</b>                     | Fatty acid hydrolase domain containing 2                                          | Immune response            |
| <b>GBP1</b>                       | Guanylate binding protein 1                                                       | Immune response            |
| <b>HSP27</b>                      | Heat shock protein 27                                                             | Intestinal homeostasis     |
| <b>HSP70</b>                      | Heat shock protein 70                                                             | Intestinal homeostasis     |
| <b>GPX2</b>                       | Glutathione peroxidase 2                                                          | Digestive enzyme / hormone |
| <b>SOD2</b>                       | Superoxide dismutase                                                              | Digestive enzyme / hormone |
| <b>ALPI</b>                       | Intestinal alkaline phosphatase                                                   | Digestive enzyme / hormone |
| <b>SI</b>                         | Sucrase-isomaltase                                                                | Digestive enzyme / hormone |
| <b>DAO1</b>                       | Diamine oxidase                                                                   | Digestive enzyme / hormone |
| <b>HNMT</b>                       | Histamine N-methyltransferase                                                     | Digestive enzyme / hormone |
| <b>ANPEP</b>                      | Aminopeptidase-N                                                                  | Digestive enzyme / hormone |
| <b>IDO1</b>                       | Indoleamine 2,3-dioxygenase                                                       | Digestive enzyme / hormone |
| <b>GCG</b>                        | Glucagon                                                                          | Digestive enzyme / hormone |
| <b>CCK</b>                        | Cholecystokinin                                                                   | Digestive enzyme / hormone |
| <b>IGF1R</b>                      | Insulin-like growth factor 1 receptor                                             | Digestive enzyme / hormone |
| <b>PYY</b>                        | Peptide YY                                                                        | Digestive enzyme / hormone |
| <b>SLC5A1</b>                     | Solute carrier family 5 (sodium/glucose cotransporter) member 1                   | Nutrient transport         |
| <b>SLC16A1</b>                    | Monocarboxylate transporter 1                                                     | Nutrient transport         |
| <b>SLC7A8</b>                     | Solute carrier family 7 (amino acid transporter light chain, L System) member 8   | Nutrient transport         |
| <b>SLC15A1</b>                    | Solute carrier family 15 (oligopeptide transporter) member 1                      | Nutrient transport         |
| <b>SLC13A1</b>                    | Solute carrier family 13 (sodium/sulfate symporters) member 1                     | Nutrient transport         |
| <b>SLC11A2</b>                    | Solute carrier family 11 (proton-coupled divalent metal ion transporter) member 2 | Nutrient transport         |
| <b>MT1A</b>                       | Metallothionein 1A                                                                | Nutrient transport         |
| <b>SLC30A1</b>                    | Solute carrier family 30 (zinc transporter) member 1                              | Nutrient transport         |
| <b>SLC39A4</b>                    | Solute carrier family 39 (zinc transporter) member 4                              | Nutrient transport         |
| <b>CRHR1</b>                      | Corticotropin releasing hormone receptor 1                                        | Stress indicators          |

|                |                                             |                   |
|----------------|---------------------------------------------|-------------------|
| <b>NR3C1</b>   | Glucocorticoid receptor                     | Stress indicators |
| <b>HSD11B1</b> | Hydroxysteroid (11-beta)<br>dehydrogenase 1 | Stress indicators |
| <b>ACTB</b>    | $\beta$ -actin                              | Housekeeping      |
| <b>B2M</b>     | $\beta$ 2-microglobulin                     | Housekeeping      |
| <b>GAPDH</b>   | Glyceraldehyde-3-phosphate<br>dehydrogenase | Housekeeping      |
| <b>TBP</b>     | TATA-Box binding protein                    | Housekeeping      |

## Supplementary figures

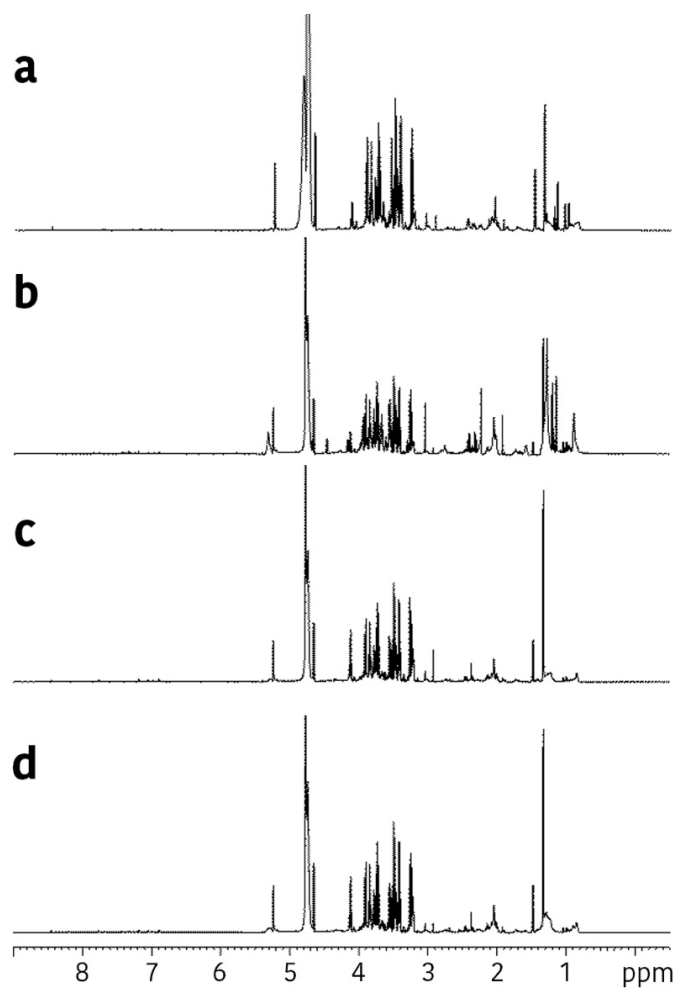

**Supplementary Figure S1.** Representative  $^1\text{H-NMR}$  spectra of serum from piglets of different experimental treatment. (a) Lactating piglets control group; (b) lactating enriched piglets' group; (c) weaned piglets control group and (d) weaned enriched piglets' group. All spectra were acquired using a 600 MHz spectrometer.

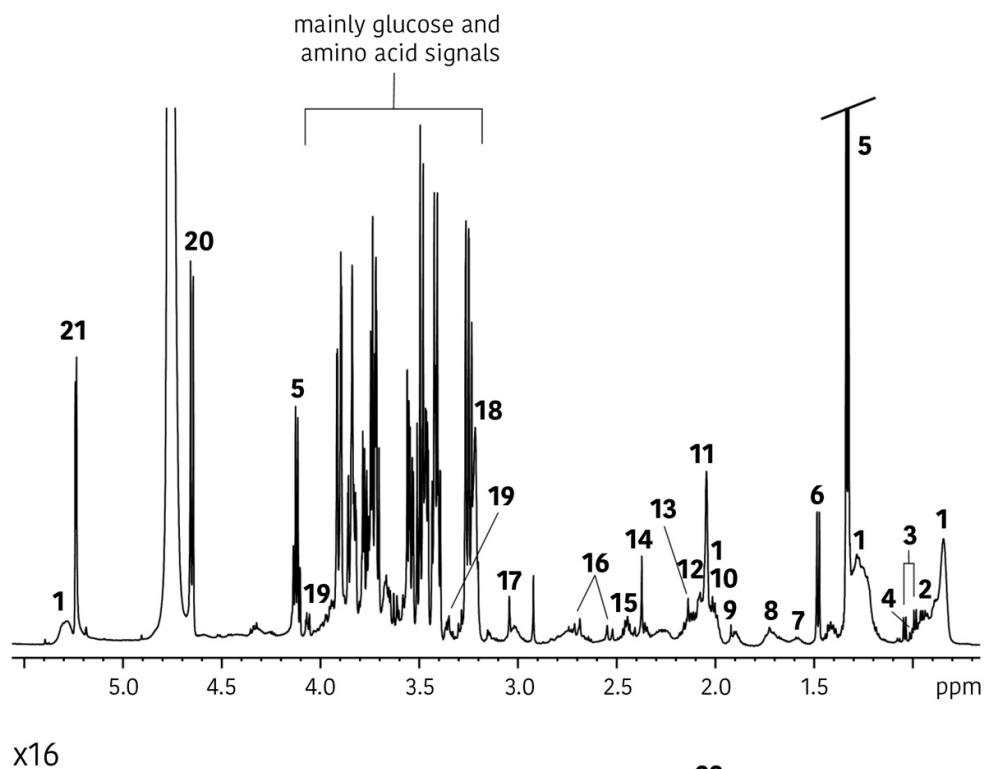

x16

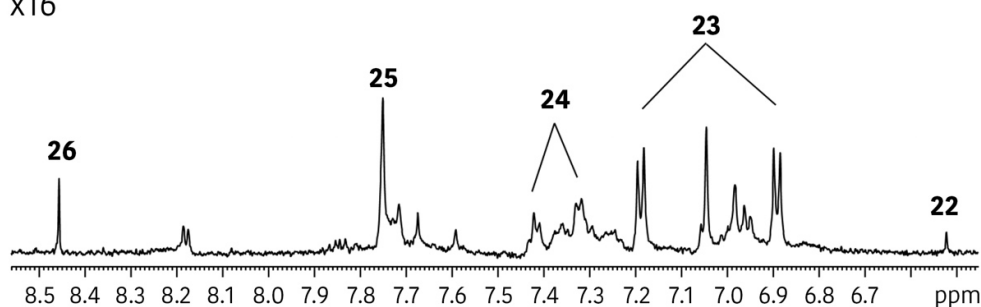

**Supplementary Figure S2.** Representative  $^1\text{H}$  CPMG spectrum (600MHz) of serum from nursing piglet. Assignments: **1**, LDL/VLDL; **2**, leucine; **3**, valine; **4**, isoleucine; **5**, lactate; **6**, alanine; **7**, adipate; **8**, arginine; **9**, acetate; **10**, proline; **11**, N-acetyl glycoproteins; **12**, O-acetyl glycoproteins; **13**, glutamine/glutamate; **14**, pyruvate; **15**, glutamate; **16**, citrate; **17**, creatine; **18**, choline; **19**, myo-inositol; **20**,  $\beta$ -glucose (anomeric proton); **21**,  $\alpha$ -glucose (anomeric proton); **22**, fumarate; **23**, tyrosine; **24**, phenylalanine; **25**, methyl histidine; **26**, formic acid.



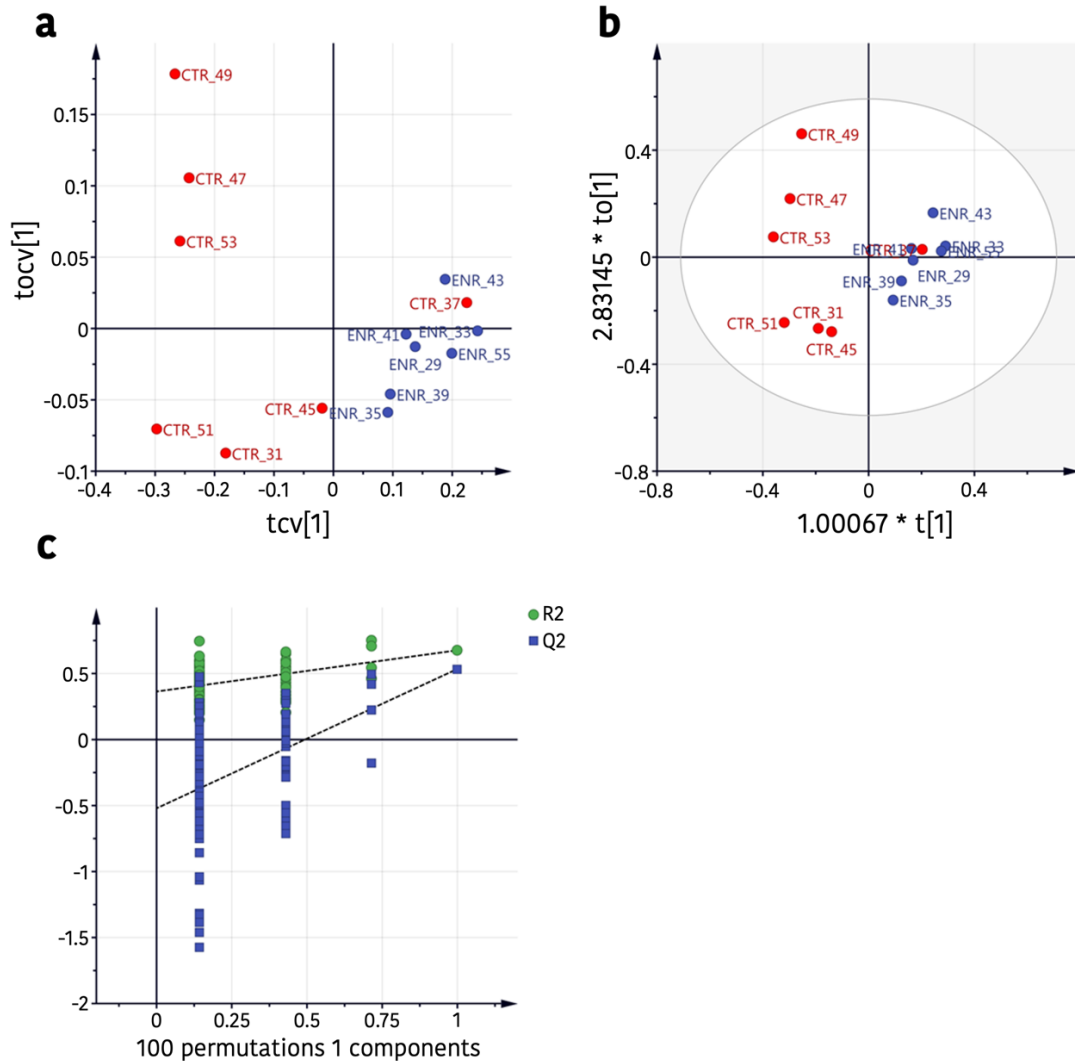

**Supplementary Figure S3.** Validation of the OPLS-DA model between enriched and control piglets at after weaning period. OPLS-DA ( $P \leq 0.06$ ) plot (**a**) derived from  $^1\text{H-NMR}$  serum spectra of weaned enriched piglets (blue) and weaned control group (red). Cross validation plot (**b**) of the OPLS-DA ( $P \leq 0.06$ ) model. 100 random permutation test plot (**c**) relative to OPLS-DA ( $P \leq 0.06$ ) model for all samples including enriched and control piglets, where the vertical axis corresponds to  $R^2$  (green circles) and  $Q^2$  (blue squares) values for the model and the horizontal axis corresponds to the correlation coefficient between the original  $Y$  and the permuted  $Y$ .

The OPLS-DA ( $P \leq 0.06$ ) model constructed to discriminate between enriched and control piglets after weaning was confirmed by cross-validation, the score plot of the regular scores (**Supplementary Fig. S3a**) compared with the score plot of the CDs course (**Supplementary Fig. S3b**) were almost the same with very little shifting of the spots which is a strong indication that the OPLS-DA ( $P \leq 0.06$ ) model is devoid of influential observations and it is very stable to the inclusion or exclusion of all the different observations. Furthermore, the plot of permutation test (100 times) (**Supplementary Fig. S3c**) performed for all samples including enriched piglets and

control piglets shows that the new parameters ( $R^2=0.36$  and  $Q^2= -0.52$ ) were lower than the original values indicating a lack of over-fitting.

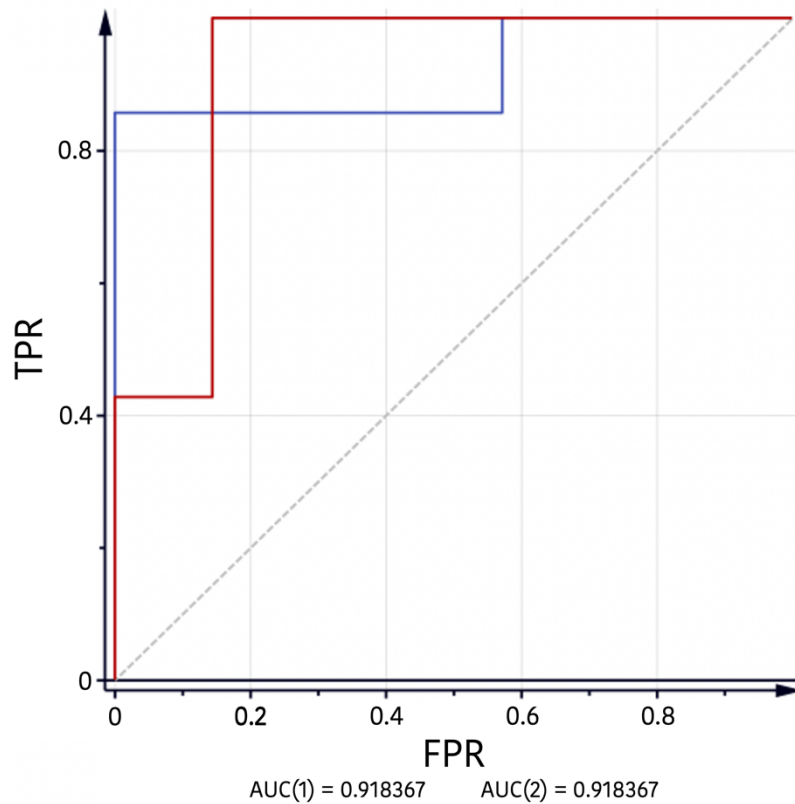

**Supplementary Figure S4.** Receiver operating characteristic (ROC) plot for the OPLS-DA ( $P \leq 0.06$ ) model at after weaning period. Weaned enriched piglets (blue) and weaned control group (red).

The operating characteristic (ROC) plot (**Supplementary Fig. S4**) for the OPLS-DA ( $P \leq 0.06$ ) model displays the true positive classification rate (TPR) for enriched group classification (blue) or for control group classification (red) by the constructed model plotted against the corresponding false positive classification rate (FPR) at various threshold settings of the criterion parameter (YPredPS). Thus, for red curve, TPR (or Sensitivity) represents the probability that a test result will be positive when the enrichment practice is present and TNR (or Specificity) corresponds to the probability that a test result will be negative when the enrichment practice is not present. Every point on the ROC curves represents a pair sensitivity/specificity values corresponding to a particular decision threshold. For both curves the area under the curve (AUC) of the ROC plot has a value of 0.92 indicating high sensitivity and specificity and thus, a high prediction power of the model.

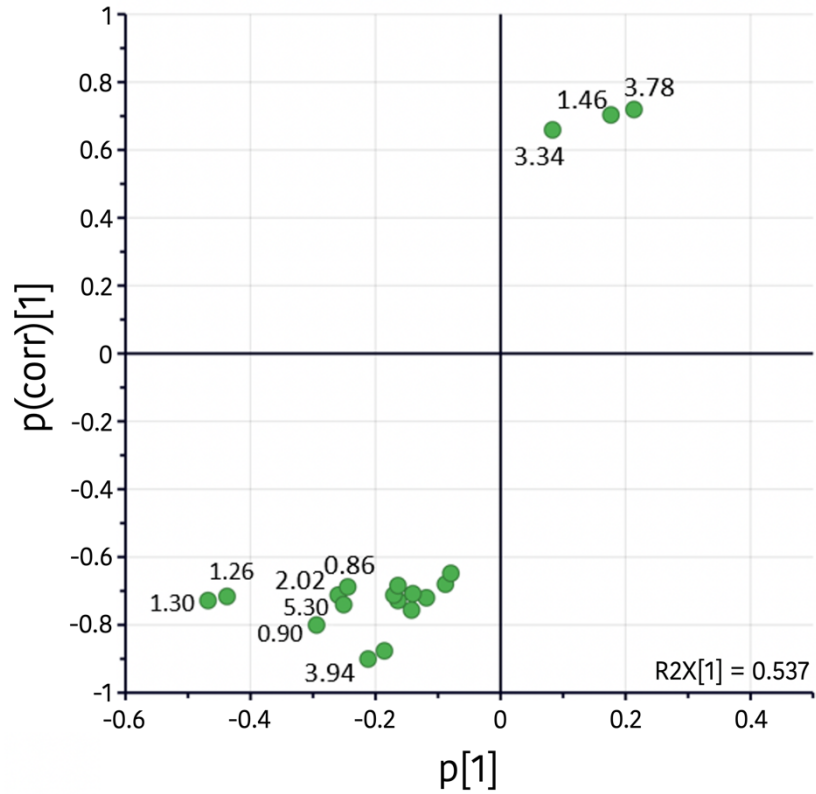

**Supplementary Figure S5.** S-plot corresponding to OPLS-DA ( $P \leq 0.06$ ) model between enriched and control piglets at after weaning period. The covariance value for each variable included is represented on the horizontal axis in the model. The vertical axis represents the correlation values obtained with respect to the dependent variable. The points at the ends of the S-plot curve indicate higher contributions to the classification.
